# Supplementary material
Source: PubMed Central journal article supplement (PMC5122446)
Supplement: NIHMS59352-supplement-suppfigs.pdf [file NIHMS59352-supplement-suppfigs.pdf]

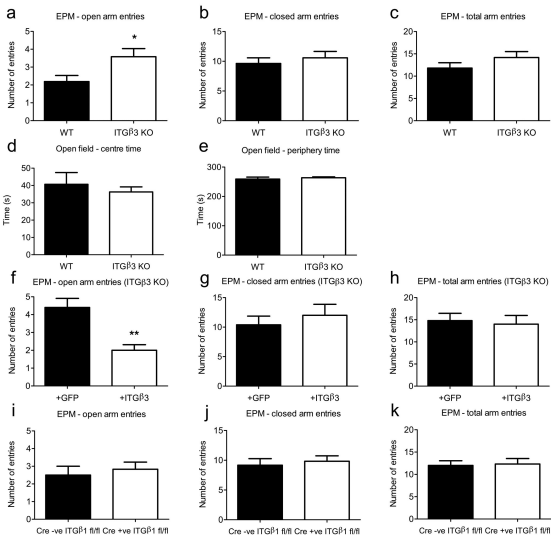

Figure S1

## Pain threshold

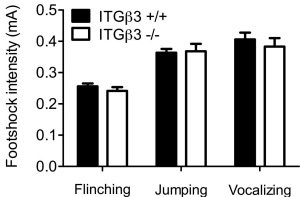

Figure S2

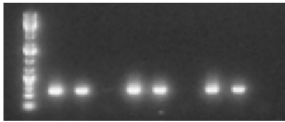

ITGβ3 +/+

ITGβ3 -/- +ITGβ3-GFP

ITGβ3 -/- +empty-GFP

ITGβ3 +/+

ITGβ3 -/- +ITGβ3-GFP

ITGβ3 -/- +empty-GFP

ITGβ3 +/+

ITGβ3 -/- +ITGβ3-GFP

ITGβ3 -/- +empty-GFP

Figure S3

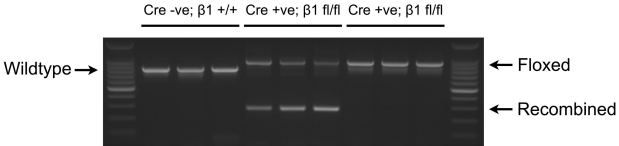

Figure S4

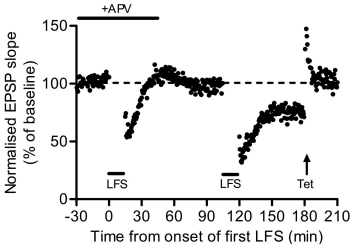

Figure S5

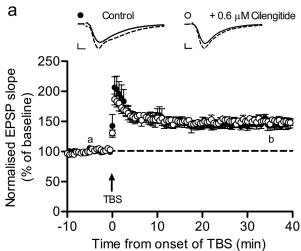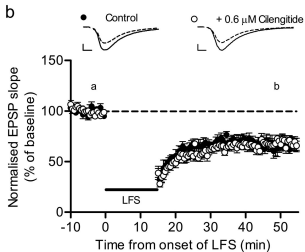

Figure S6
